# Supplementary material
Source: PubMed Central journal article supplement (PMC3429333)
Supplement: NIHMS386204-supplement-supplement_1.pdf [file NIHMS386204-supplement-supplement_1.pdf]

| Test                                      | Units   | M Norm Range | F Norm Range | Mean  | Std Dev | N (F)          | High | Low | % Abn |
|-------------------------------------------|---------|--------------|--------------|-------|---------|----------------|------|-----|-------|
| Carbon Dioxide                            | mmol/L  | 20-28        | 20-28        | 25.3  | 2.9     | 29 (13)        | 5    | 1   | 21    |
| Basophils                                 | %       | 0.2-1.2      | 0.1-1.2      | 0.9   | 0.7     | 27 (11)        | 3    | 2   | 19    |
| Platelets                                 | thou/uL | 150-330      | 160-370      | 212.2 | 65.6    | 42 (18)        | 1    | 6   | 17    |
| Aspartate Transaminase                    | IU/L    | 0-50         | 0-50         | 36.3  | 18.1    | 30 (14)        | 5    | 0   | 17    |
| Neutrophils                               | %       | 34-67.9      | 34-71.1      | 53.7  | 15.4    | 28 (13)        | 2    | 2   | 14    |
| Hemoglobin                                | g/dL    | 13.7-17.5    | 11.2-15.7    | 14.3  | 1.9     | 41 (17)        | 1    | 4   | 12    |
| Immunoglobulin M                          | mg/dL   | 46-304       | 46-304       | 105.6 | 62.4    | 17 (7)         | 0    | 2   | 12    |
| Mean Corpuscular Hemoglobin               | pg/cell | 27-33        | 27-33        | 30.8  | 2.1     | 46 (19)        | 3    | 2   | 11    |
| Thyroid Stimulating Hormone               | uIU/mL  | 0.35-5.5     | 0.35-5.5     | 2.9   | 3.9     | 32 (13)        | 3    | 0   | 9     |
| Chloride                                  | mmol/L  | 96-108       | 96-108       | 104.8 | 2.7     | 29 (13)        | 2    | 0   | 7     |
| Urea Nitrogen                             | mg/dL   | 6-20         | 6-20         | 12.9  | 8.8     | 29 (12)        | 2    | 0   | 7     |
| Alkaline Phosphatase                      | IU/L    | 40-130       | 35-105       | 88.3  | 55.7    | 27 (12)        | 2    | 0   | 7     |
| Monocytes #                               | thou/uL | 0.3-0.8      | 0.2-0.9      | 0.5   | 0.2     | 24 (10)        | 0    | 1   | 4     |
| Mean Corpuscular Hemoglobin Concentration | g/dL    | 31-36        | 31-36        | 34.3  | 1.1     | 46 (19)        | 1    | 0   | 2     |
| Potassium                                 | mmol/L  | 3.3-5.1      | 3.3-5.1      | 4.2   | 0.4     | 30 (14)        | 0    | 0   | 0     |
| Sodium                                    | mmol/L  | 133-145      | 133-145      | 139.8 | 2.3     | 29 (13)        | 0    | 0   | 0     |
| Total Bilirubin                           | mg/dL   | 0-1.2        | 0-1.2        | 0.6   | 0.2     | 24 (9)         | 0    | 0   | 0     |
| Immunoglobulin A                          | mg/dL   | 82-453       | 82-453       | 158.2 | 52.7    | 17 (7)         | 0    | 0   | 0     |
|                                           |         |              |              |       |         | 1,271<br>(551) | 160  | 152 | 24.5  |
| N = 43                                    |         |              |              |       |         |                |      |     |       |

**Supplemental Table 1: DM2 Laboratory Data: All tests with N<15**

| Test                         | Units   | M Norm Range | F Norm Range | Mean  | Std Dev | N (F)  | High | Low | % Abn |
|------------------------------|---------|--------------|--------------|-------|---------|--------|------|-----|-------|
| A-1-Antitrypsin              | mg/dL   | 88-174       | 88-174       | 169.0 | -       | 1 (-)  | 0    | 0   | 0     |
| Amylase                      | u/L     | 28-100       | 28-100       | 72.0  | 42.9    | 3 (1)  | 1    | 1   | 67    |
| Anion Gap                    | mmol/L  | 7-16         | 7-16         | 10.7  | 5.3     | 11 (4) | 1    | 0   | 9     |
| CK_MB2                       | u/L     | 0-15         | 0-15         | 19.5  | 16.3    | 2 (1)  | 1    | 0   | 50    |
| Direct Bilirubin             | mg/dL   | 0-0.3        | 0-0.3        | 0.1   | 0.0     | 5 (3)  | 0    | 0   | 0     |
| Eosinophils #                | thou/uL | 0-0.5        | 0-0.4        | 0.2   | 0.2     | 13 (5) | 1    | 0   | 8     |
| Follicle Stimulating Hormone | mIU/mL  | 1.4-18.1     | 1.7-134.8    | 30.0  | 27.4    | 12 (4) | 5    | 1   | 50    |
| Factor VII                   | IU/dL   | 50-170       | 50-170       | 48.0  | -       | 1 (-)  | 0    | 1   | 100   |
| Ferritin                     | ng/mL   | 22-322       | 10-291       | 59.0  | 71.0    | 3 (2)  | 0    | 0   | 0     |

| Test                     | Units  | M Norm Range | F Norm Range | Mean  | Std Dev | N (F)       | High | Low | % Abn |
|--------------------------|--------|--------------|--------------|-------|---------|-------------|------|-----|-------|
| Free Thyroxine           | ng/dL  | 0.9-1.8      | 0.9-1.8      | 1.3   | 0.5     | 5 (1)       | 1    | 1   | 40    |
| Globulin                 | g/dL   | 2.7-4.3      | 2.7-4.3      | 2.8   | 0.4     | 10 (4)      | 0    | 4   | 40    |
| High Density Lipoprotein | mg/dL  | 40-60        | 40-60        | 51.4  | 20.6    | 7 (2)       | 3    | 3   | 86    |
| Hemoglobin A1C           | %      | 0-5.9        | 0-5.9        | 6.2   | 0.9     | 3 (2)       | 2    | 0   | 67    |
| Homocysteine             | umol/L | 5-12         | 5-12         | 12.3  | -       | 1 (-)       | 1    | 0   | 100   |
| Immunoglobulin E         | ku/L   | 0-158        | 0-158        | 759.1 | 2263.9  | 14 (6)      | 5    | 0   | 36    |
| Iron                     | ug/dL  | 45-170       | 34-165       | 82.5  | 35.4    | 4 (1)       | 0    | 0   | 0     |
| Luteinizing Hormone      | mIU/mL | 3.1-34       | 0-76.3       | 18.7  | 17.9    | 11 (3)      | 0    | 1   | 9     |
| Lipase                   | U/L    | 13-60        | 13-60        | 104.8 | 120.1   | 5 (1)       | 2    | 1   | 60    |
| Magnesium                | meq/l  | 1.1-2.2      | 1.1-2.2      | 1.7   | 0.1     | 4 (2)       | 0    | 0   | 0     |
| Phosphorus               | mg/dL  | 2.7-4.5      | 2.7-4.5      | 3.7   | 0.6     | 14 (5)      | 0    | 1   | 7     |
| Sedimentation Rate       | mm/hr  | 0-20         | 0-30         | 14.7  | 6.5     | 6 (1)       | 1    | 0   | 17    |
| Thyroxine                | ug/dL  | 4.5-10.9     | 4.5-10.9     | 8.1   | 1.9     | 10 (2)      | 0    | 0   | 0     |
| Testosterone             | ng/dL  | 241-827      | 14-76        | 437.7 | 342.7   | 7 (2)       | 3    | 1   | 57    |
| Urate                    | mg/dL  | 3.9-9.0      | 2.7-6.8      | 4.2   | 1.0     | 13 (4)      | 0    | 3   | 23    |
| Vitamin B12              | pg/mL  | 211-911      | 211-911      | 704.7 | 428.7   | 6 (2)       | 2    | 0   | 33    |
|                          |        |              |              |       |         | 171<br>(58) | 29   | 18  | 27.5  |
| N = 25                   |        |              |              |       |         |             |      |     |       |

**M= Male, F= Female, Norm= Normal, Std Dev= Standard Deviation, N= Number,**

**Abn= Abnormal**
